# Supplementary material for: Internal vibrational energy redistribution precedes energy dissipation into the solvent upon photoexcitation of heme proteins
Source: Royal Society of Chemistry journal article supplement (doi:10.1039/d5cp00797f), 2025-01-01
Supplement: d5cp00797f1.pdf [file d5cp00797f1.pdf]

Supplementary Material: Energy Relaxation into the Solvent upon photoexcitation of Heme Proteins

Table 1: Jet thicknesses for cytochrome c and myoglobin in  $H_2O$  and  $D_2O$

| Sample                 | Jet thickness [ $\mu\text{m}$ ] |
|------------------------|---------------------------------|
| Cytochrome c           | 28                              |
| Cytochrome c in $D_2O$ | 13                              |
| Myoglobin              | 28                              |
| Myoglobin in $D_2O$    | 25                              |

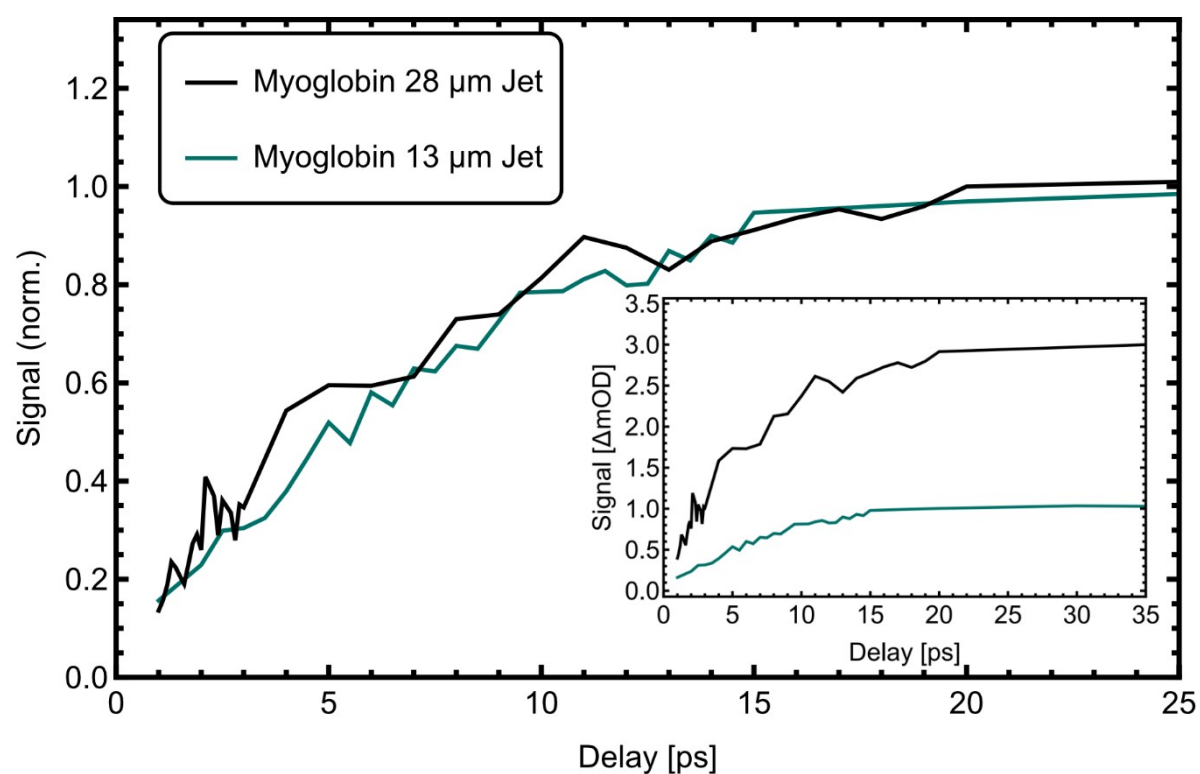

Figure 1: Plot of the fitted maximum amplitude when fitting a Gaussian to the OPTP spectrum of myoglobin in water ( $\Delta\text{mOD}$ ) at time delays between one and 25 ps, For a thick jet (28  $\mu\text{m}$ , green) and a thin jet (13  $\mu\text{m}$ , black). The inset shows the nonnormalized amplitudes.
